# Supplementary material
Source: PubMed Central journal article supplement (PMC4576495)
Supplement: supp_mol.114.093914_mol093914err_proof.pdf [file supp_mol.114.093914_mol093914err_proof.pdf]

# Correction to “G $\alpha_{13}$ /PDZ-RhoGEF/RhoA Signaling Is Essential for Gastrin-Releasing Peptide Receptor–Mediated Colon Cancer Cell Migration”

In the above article [Patel M, Kawano T, Suzuki N, Hamakubo T, Karginov AV, and Kozasa T (2014) *Mol Pharmacol* **86**:252–262], the below funding information was omitted:

This work was supported by National Institute of Health grants [GM61454] to T.K., T32 [HL007829] to M.P., and [R21CA159179] to A.V.K.; and grants from the Ministry of Education, Science, and Technology of Japan, and FIRST program from Japan Society for the Promotion and Science. FIRST represents Funding Program for World-Leading Innovative R&D on Science and Technology. A.V.K. and T.K. contributed equally to this work as co-corresponding senior authors.

The authors regret this error and any inconvenience it may have caused.
